# Supplementary material for: The Biocontrol Potential of Endophytic Trichoderma Fungi Isolated from Hungarian Grapevines, Part II, Grapevine Stimulation
Source: MDPI journal article supplement (doi:10.3390/pathogens12010002), 2022-12-20
Supplement: s1 [file s1]

**Table S1.** Effect of the *Trichoderma* treatment (*Trichoderma*) on the yield of Blaufraenkisch clones in the Experimental field I.

| Blaufraenkisch<br>clone | Treatment <sup>1</sup> | Row | No. of<br>grapevines | Plant loss<br>(%) | Yield (kg/plant) |             |             |
|-------------------------|------------------------|-----|----------------------|-------------------|------------------|-------------|-------------|
|                         |                        |     |                      |                   | experimental     | potential   |             |
| A4/1                    | Control                | 1   | 148                  | 2.70              | 2.68             | 2.76        |             |
|                         |                        | 2   | 165                  | 4.24              | 2.78             | 2.90        |             |
|                         |                        | 3   | 165                  | 1.82              | 2.22             | 2.26        |             |
|                         |                        | 4   | 165                  | 1.21              | 3.15             | 3.18        |             |
|                         |                        | 5   | 165                  | 1.21              | 1.57             | 1.59        |             |
|                         | mean(±SE)              |     |                      | 2.24(±0.57)       | 2.48(±0.27)      | 2.54(±0.28) |             |
|                         | <i>Trichoderma</i>     | 1   | 165                  | 4.24              | 3.15             | 3.28        |             |
|                         |                        | 2   | 165                  | 2.42              | 2.78             | 2.84        |             |
|                         |                        | 3   | 165                  | 2.42              | 2.96             | 3.03        |             |
|                         |                        | 4   | 165                  | 0.61              | 2.59             | 2.60        |             |
|                         |                        | 5   | 165                  | 1.21              | 2.41             | 2.44        |             |
|                         |                        | 6   | 165                  | 1.82              | 2.59             | 2.64        |             |
|                         | mean(±SE)              |     |                      | 2.12(±0.51)       | 2.74(±0.11)      | 2.81(±0.13) |             |
| Kt1                     | Control                | 1   | 187                  | 9.09              | 2.45             | 2.69        |             |
|                         |                        | 2   | 187                  | 5.88              | 2.28             | 2.43        |             |
|                         |                        | 3   | 187                  | 0.53              | 1.47             | 1.48        |             |
|                         |                        | 4   | 187                  | 5.88              | 1.30             | 1.39        |             |
|                         | mean(±SE)              |     |                      | 5.35(±1.77)       | 1.88(±0.29)      | 2.00(±0.33) |             |
|                         | <i>Trichoderma</i>     | 1   | 187                  | 8.56              | 2.28             | 2.50        |             |
|                         |                        | 2   | 187                  | 8.56              | 2.28             | 2.50        |             |
|                         |                        | 3   | 187                  | 3.74              | 2.45             | 2.54        |             |
|                         |                        | 4   | 187                  | 8.02              | 1.80             | 1.95        |             |
|                         |                        | 5   | 187                  | 10.16             | 1.96             | 2.18        |             |
|                         |                        | 6   | 187                  | 7.49              | 2.12             | 2.29        |             |
|                         |                        | 7   | 187                  | 3.21              | 2.94             | 3.03        |             |
|                         | mean(±SE)              |     |                      | 7.10(±0.99)       | 2.26(±0.14)      | 2.43(±0.13) |             |
| Overall mean            | Control                |     |                      |                   | 3.62(±0.96)      | 2.21(±0.21) | 2.30(±0.22) |
|                         | <i>Trichoderma</i>     |     |                      |                   | 4.80(±0.91)      | 2.48(±0.11) | 2.60(±0.10) |

<sup>1</sup>: treatment (*Trichoderma*) with combination of *T. simmonsii*, *T. orientale* and *T. gamsii*
